# Supplementary material for: Ferroelectric crystals with naphthenic hydrocarbon-modified carborane vertices
Source: Royal Society of Chemistry journal article supplement (doi:10.1039/d4qi03172e), 2025-01-01
Supplement: d4qi03172e1.pdf [file d4qi03172e1.pdf]

## Supporting Information

Ferroelectric Crystals with Naphthenic Hydrocarbon-Modified Carborane

Vertices

Wenjing Guo, Xiao Sun, Wenkang Cheng, Guoyong Chen, Ying Wei, Zhenhong Wei\*,  
and Hu Cai\*

[\*]Prof. Dr. Z.-H. Wei, Prof. Dr. H. Cai

School of Chemistry and Chemical Engineering,

Nanchang University

Nanchang City, 330031, P.R. China

E-mail: [caihu@ncu.edu.cn](mailto:caihu@ncu.edu.cn); [weizh@ncu.edu.cn](mailto:weizh@ncu.edu.cn)

## Table of contents

|                                                                                                                                                                                             |    |
|---------------------------------------------------------------------------------------------------------------------------------------------------------------------------------------------|----|
| Experimental Procedures.....                                                                                                                                                                | 3  |
| Materials.....                                                                                                                                                                              | 3  |
| Measurement Methods.....                                                                                                                                                                    | 3  |
| Single-crystal and powder X-ray crystallography.....                                                                                                                                        | 3  |
| Thermal analyses.....                                                                                                                                                                       | 3  |
| SHG and dielectric measurements.....                                                                                                                                                        | 4  |
| Thin-Film Preparation.....                                                                                                                                                                  | 4  |
| PFM characterization.....                                                                                                                                                                   | 4  |
| IR measurements.....                                                                                                                                                                        | 4  |
| NMR measurements.....                                                                                                                                                                       | 4  |
| Characterization data.....                                                                                                                                                                  | 5  |
| Figure S1. Experimental IR absorption spectra of <b>1</b> (a) and <b>2</b> (b).....                                                                                                         | 6  |
| Figure S2. The <sup>1</sup> H NMR, <sup>1</sup> H{B} NMR, <sup>11</sup> B NMR, <sup>11</sup> B{ <sup>1</sup> H} NMR and <sup>13</sup> C NMR spectrum of <b>1</b> in CDCl <sub>3</sub> ..... | 8  |
| Figure S3. The <sup>1</sup> H NMR, <sup>1</sup> H{B} NMR, <sup>11</sup> B NMR, <sup>11</sup> B{ <sup>1</sup> H} NMR and <sup>13</sup> C NMR spectrum of <b>2</b> in CDCl <sub>3</sub> ..... | 10 |
| Figure S4. TGA of <b>1</b> (a) and <b>2</b> (b).....                                                                                                                                        | 11 |
| Figure S5. Crystal packing diagram of <b>1</b> (a) and <b>2</b> (b).....                                                                                                                    | 11 |
| Figure S6. The temperature-dependent real part ( $\epsilon'$ ) of the dielectric constant at different frequency for both <b>1</b> (a) and <b>2</b> (b).....                                | 11 |
| Figure S7. Switching SHG cycles of <b>1</b> (a) and <b>2</b> (b).....                                                                                                                       | 11 |
| Figure S8. Pawley refinement of PXRD data of <b>1–2</b> collected at high temperature.....                                                                                                  | 12 |

## Experimental Procedures

### Materials

*o*-Carborane and bromoalkane were purchased from Bidepharm and Admas. All solvents were distilled from appropriate drying agents under argon before use.

1,2-(1,3-Propanediyl)-*o*-carborane (**1**) and 1,2-(1,4-Hexanediyl)-*o*-carborane (**2**): In a dry, inert argon atmosphere, *o*-carborane (**2**): In (288 mg, 2 mmol) was dissolved in anhydrous tetrahydrofuran (THF) as the solvent. To this solution, *n*-butyllithium in *n*-hexane (1.60 M, 2.5 mL, 4 mmol) was added dropwise at 0°C. The reaction mixture was then brought to room temperature and stirred for 1 hour. After cooling again to 0°C, 1-bromo-3-chloropropane (314.8 mg, 2 mmol) or 1,4-dibromobutane (431.8 mg, 2 mmol) was gradually added, followed by stirring overnight at room temperature. The reaction progress was monitored by thin-layer chromatography (TLC). Upon completion, the reaction mixture was quenched with 20 mL of water and extracted with diethyl ether (3 × 20 mL). The organic layers were dried over anhydrous sodium sulfate. After solvent removal, the residue was subjected to column chromatography on silica gel (300–400 mesh) using *n*-hexane as the eluent, yielding **1** and **2** as white powders. **Yield: 1**: 213.4 mg (58%). Anal. calcd. for C<sub>5</sub>H<sub>16</sub>B<sub>10</sub>:C, 32.60; H, 8.70; B, 58.7. Found: C, 32.50; H, 8.80; B, 58.60.; **2**: 237.6 mg (60%). Anal. calcd. for C<sub>6</sub>H<sub>18</sub>B<sub>10</sub>:C, 36.40; H, 9.10; B, 54.50. Found: C, 36.20; H, 9.20; B, 54.60.

### Measurement Methods

#### Single-crystal and powder X-ray crystallography.

X-ray single-crystal diffraction experiments were performed on a Rigaku Saturn 924 diffractometer with Mo-K $\alpha$  radiation ( $\lambda = 0.71073 \text{ \AA}$ ). For X-ray diffraction (XRD) analysis, a PANalytical X'Pert3 diffractometer with a Cu K $\alpha$  X-ray source ( $\lambda = 1.5418 \text{ \AA}$ , 40 kV, 150 mA) was used, and measurements were conducted at a scan rate of  $10^\circ \text{ min}^{-1}$ . Supplementary crystallographic data for this study, assigned as Deposition Numbers **2400878** (for 1,2-(1,3-Propanediyl)-*o*-carborane) and **2400879** (for 1,2-(1,4-Hexanediyl)-*o*-carborane), are available without charge through the joint Access Structures service provided by the Cambridge Crystallographic Data Centre.

#### Thermal analyses.

Differential scanning calorimetry (DSC) analyses were conducted using a NETZSCH DSC 200F3 instrument. Crystalline samples were subjected to both heating and cooling cycles at a

constant rate of 20 K/min, with measurements performed in aluminum crucibles under a nitrogen atmosphere.

#### **SHG and dielectric measurements.**

The second harmonic generation (SHG) measurements were conducted using INSTEC instruments. Complex dielectric permittivity was measured with the DMS-1000 dielectric temperature spectrum measurement system. Silver conductive paste was applied to the surfaces of the samples to serve as both top and bottom electrodes.

#### **Thin-Film Preparation**

Indium tin oxide (ITO) glass substrates were subjected to a preliminary cleaning process prior to use. Crystalline samples **1** and **2** (each 20 mg) were dissolved in 300  $\mu\text{L}$  of *n*-hexane. After cleaning, the ITO glass substrate was selected, and 20  $\mu\text{L}$  of the solution was spin-coated onto its surface. The solvent was then allowed to evaporate gradually at room temperature, resulting in the formation of a polycrystalline thin film.

#### **PFM characterization.**

PFM measurements were performed using a piezoresponse force microscopy (PFM) system (Cypher ES by Oxford Instruments), equipped with a high-voltage package. PFM, an extension of atomic force microscopy (AFM), applies an AC drive voltage to a conductive tip to probe piezoelectric properties. In our experiments, we used conductive Pt/Ir-coated silicon probes (EFM, Nanoworld) with an approximate nominal spring constant of 2.8 nN/nm and a free-air resonance frequency of around 75 kHz. All PFM experiments were conducted in Dual Frequency Tracking mode, which enabled both high-resolution domain imaging and analysis of polarization switching behaviors.

#### **IR measurements.**

The powder was ground to a uniform particle size and its infrared spectrum was measured at room temperature. Fourier Transform Infrared (FTIR) spectra were recorded using a Bruker Alpha II instrument.

#### **NMR measurements.**

The  $^1\text{H}$  and  $^{13}\text{C}$  nuclear magnetic resonance (NMR) spectra were acquired using a Bruker Advance III 400 spectrometer (400 MHz for  $^1\text{H}$ , 100 MHz for  $^{13}\text{C}$  and 128 MHz for  $^{11}\text{B}$  NMR). The samples were dissolved in either  $\text{CDCl}_3$  or  $\text{CD}_3\text{CN}$ , with TMS serving as the internal reference

standard. The chemical shifts ( $\delta$ ) were measured in ppm and referenced to TMS ( $\delta = 0$ ) for  $^1\text{H}$ , chloroform ( $\delta = 77.0$ ) for  $^{13}\text{C}$ , and acetonitrile ( $\delta = 118.26$ ) for  $^{13}\text{C}$  as internal standards. For  $^{11}\text{B}$  and  $^{11}\text{B}\{^1\text{H}\}$  NMR spectra, data were calibrated using external  $\text{BF}_3\cdot\text{Et}_2\text{O}$  as the reference compound.

#### Characterization data.

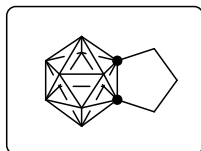

**1:** White solid, 77%;  $^1\text{H}$  NMR (400 MHz,  $\text{CDCl}_3$ , room temperature spectrum):  $\delta$  2.51-2.48 (m, 4H), 2.45-2.39 (m, 2H);  $^1\text{H}\{^{11}\text{B}\}$  NMR (400 MHz,  $\text{CDCl}_3$ , room temperature spectrum):  $\delta$  2.51-2.47 (m, 4H), 2.45-2.39 (m, 2H), 2.26 (s, 6H), 2.15 (s, 2H), 2.11 (s, 2H).  $^{13}\text{C}$  NMR (100 MHz,  $\text{CDCl}_3$ , room temperature spectrum):  $\delta$  83.81, 34.68, 32.02;  $^{11}\text{B}$  NMR (128 MHz,  $\text{CDCl}_3$ , room temperature spectrum):  $\delta$  -6.24 (s, 1B), -7.46 (s, 2B), -8.49 (s, 2B), -9.70 (s, 1B), -11.08 (s, 2B), -12.36 (s, 2B);  $^{11}\text{B}\{^1\text{H}\}$  NMR (128 MHz,  $\text{CDCl}_3$ , room temperature spectrum):  $\delta$  -6.79 (2B), -8.07 (2B), -8.99 (2B), -11.69 (4B).

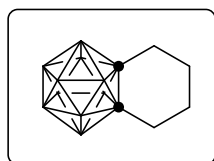

**2:** White solid, 83%;  $^1\text{H}$  NMR (400 MHz,  $\text{CDCl}_3$ , room temperature spectrum):  $\delta$  2.43 (m, 4H), 1.60-1.56 (m, 4H);  $^1\text{H}\{^{11}\text{B}\}$  NMR (400 MHz,  $\text{CDCl}_3$ , room temperature spectrum):  $\delta$  2.42-2.39 (m, 4H), 2.30-2.26 (m, 2H), 2.19-2.01 (m, 8H), 1.58-1.48 (m, 4H);  $^{13}\text{C}$  NMR (100 MHz,  $\text{CDCl}_3$ , room temperature spectrum):  $\delta$  73.08, 32.74, 19.63;  $^{11}\text{B}$  NMR (128 MHz,  $\text{CDCl}_3$ , room temperature spectrum):  $\delta$  -5.19 – -6.34 (d, 2B), -8.93 – -10.22 (d, 1B), -10.91 – -12.28 (d, 2B);  $^{11}\text{B}\{^1\text{H}\}$  NMR (128 MHz,  $\text{CDCl}_3$ , room temperature spectrum):  $\delta$  -5.79 (2B), -9.59 (6B), -11.65 (2B).

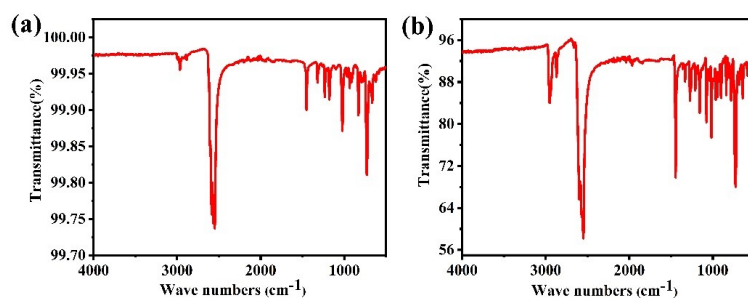

Figure S1. Experimental IR absorption spectra of **1** (a) and **2** (b).

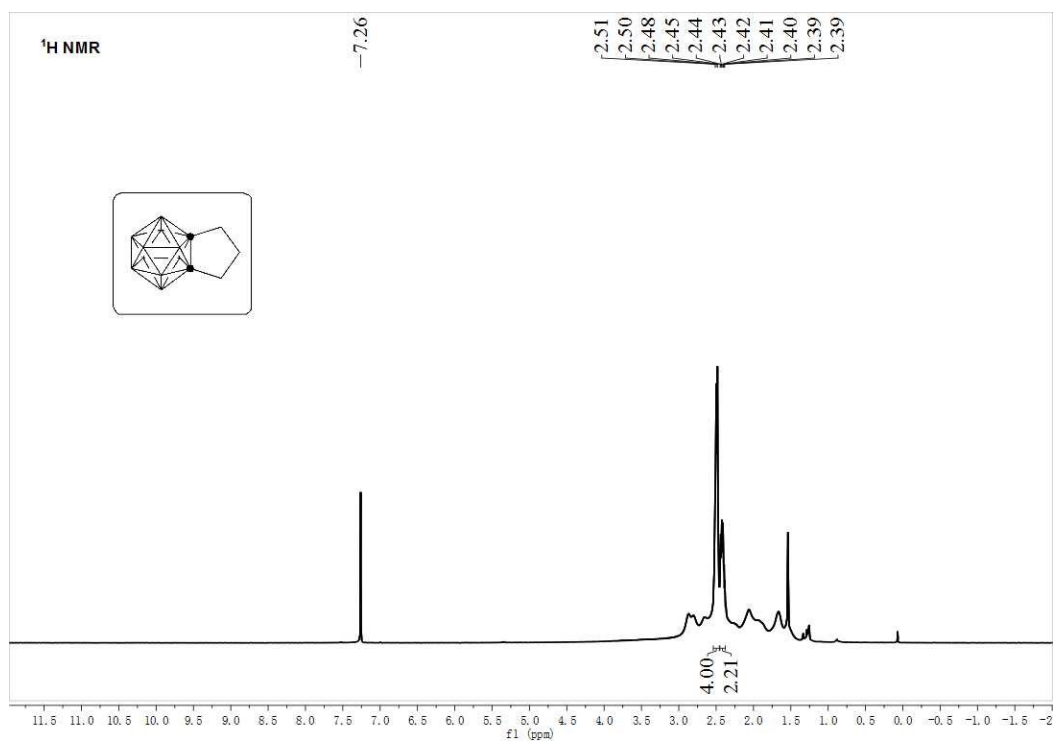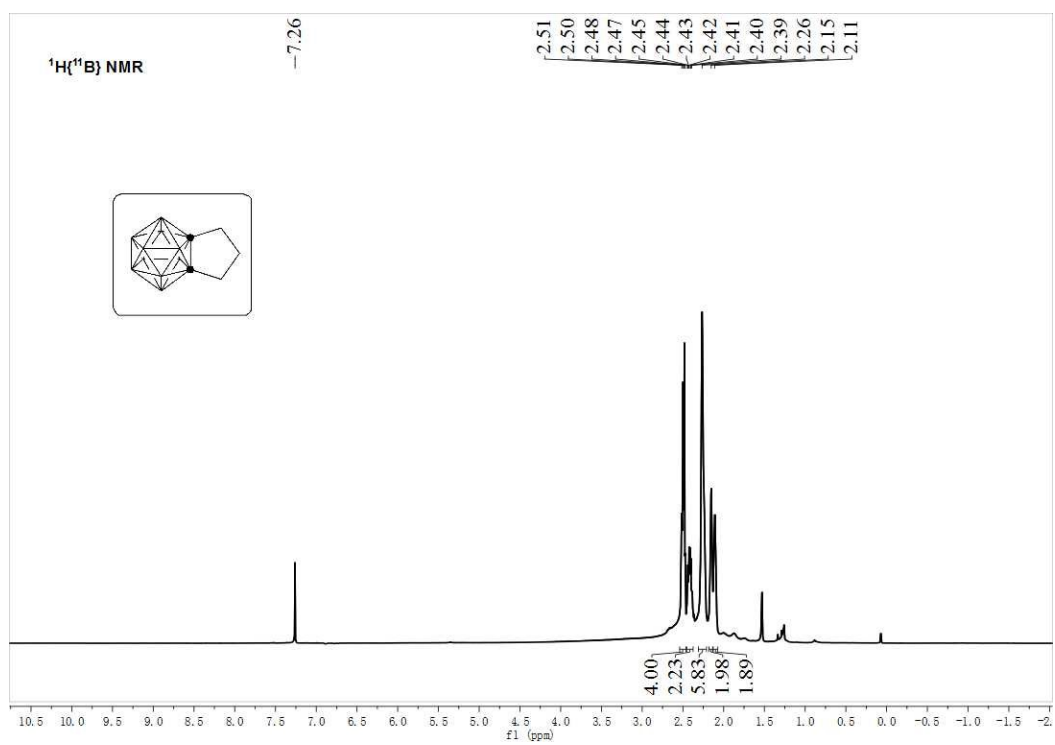

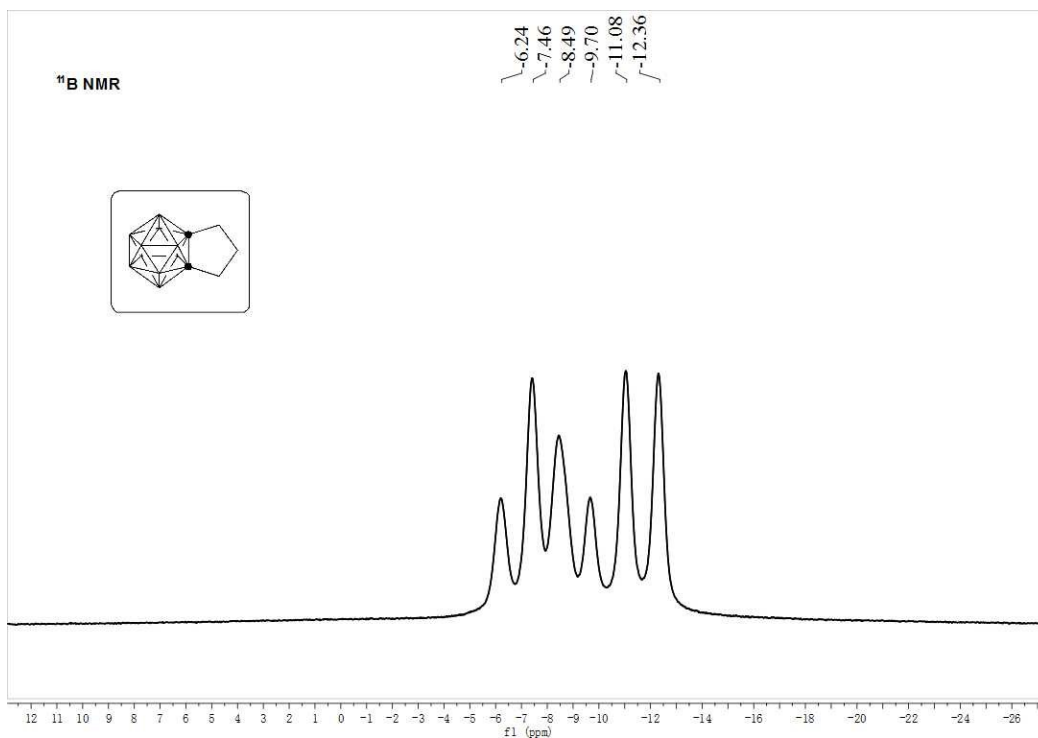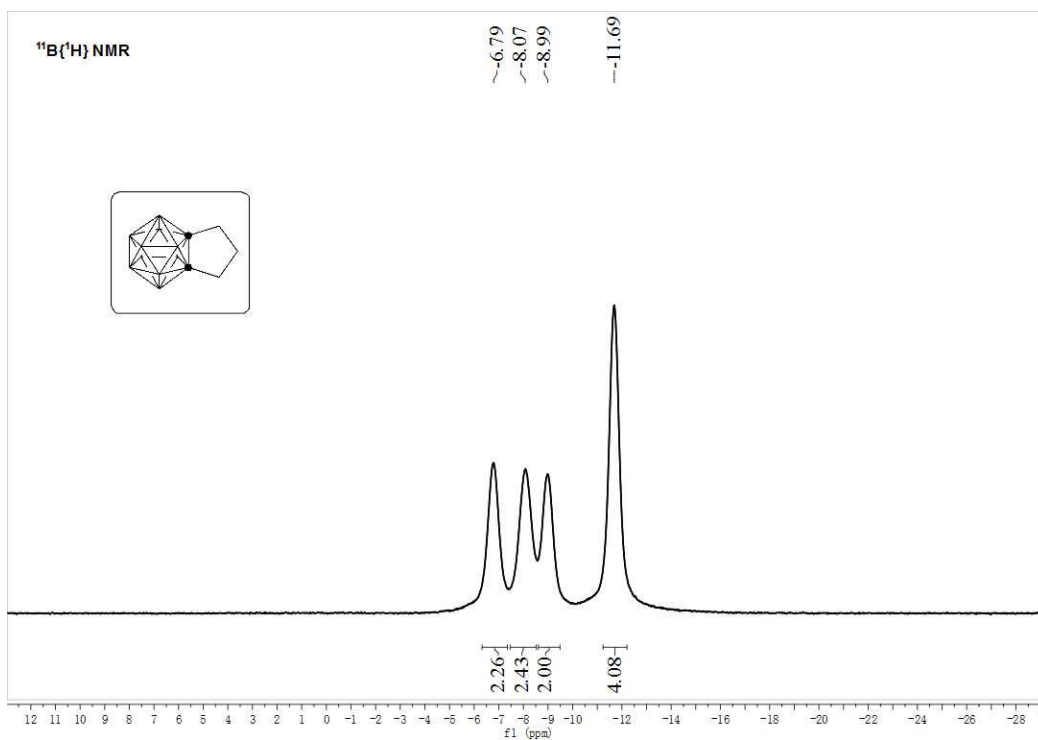

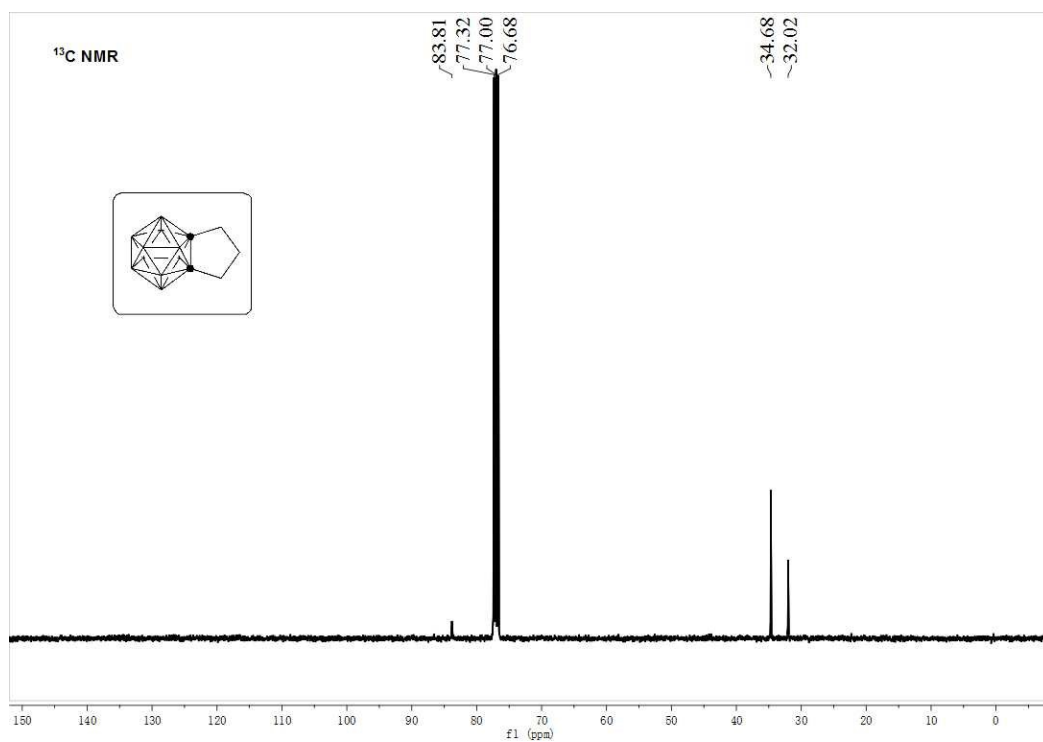

Figure S2. The <sup>1</sup>H NMR, <sup>1</sup>H{B} NMR, <sup>11</sup>B NMR, <sup>11</sup>B{<sup>1</sup>H} NMR and <sup>13</sup>C NMR spectrum of **1** in CDCl<sub>3</sub>.

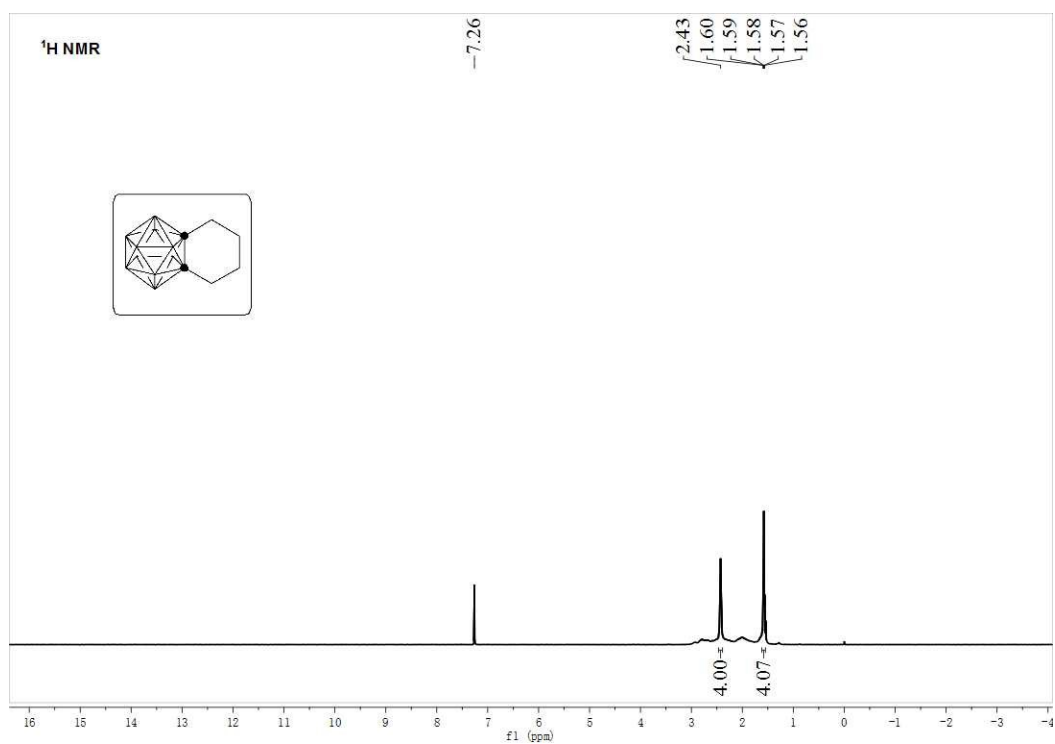



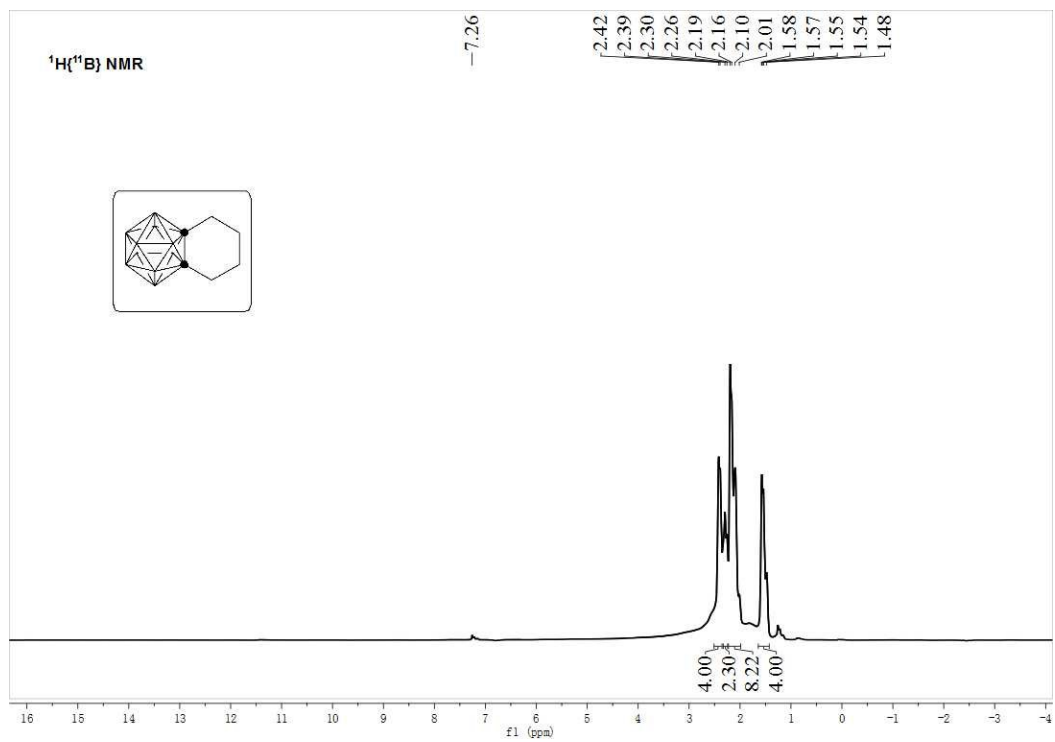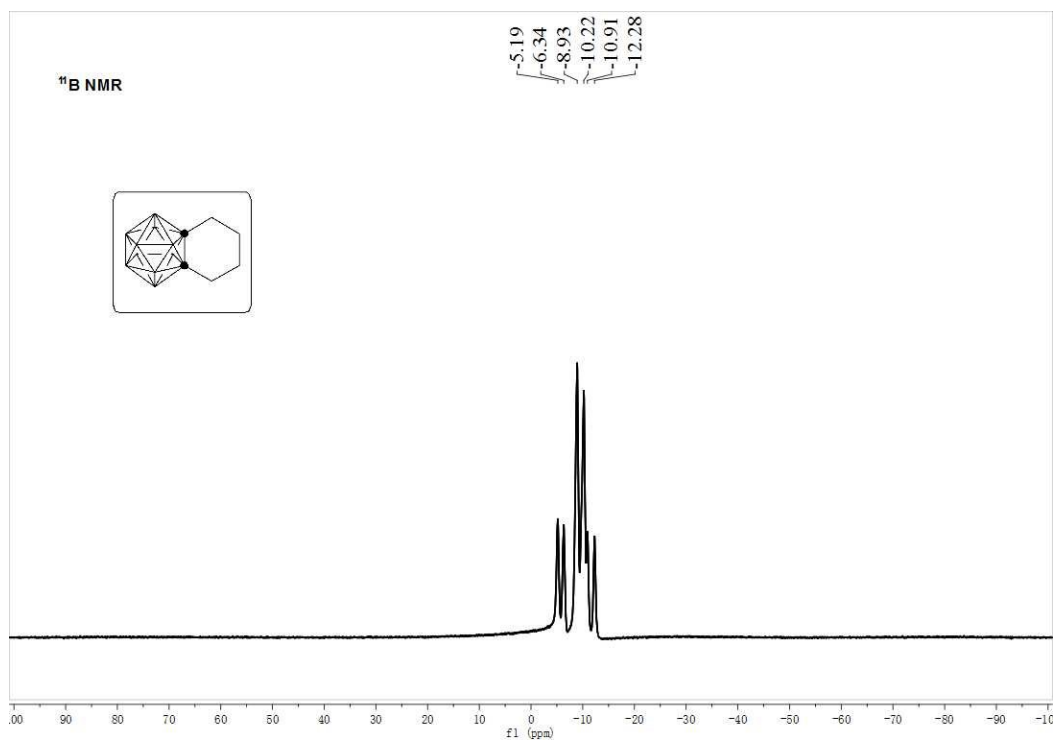

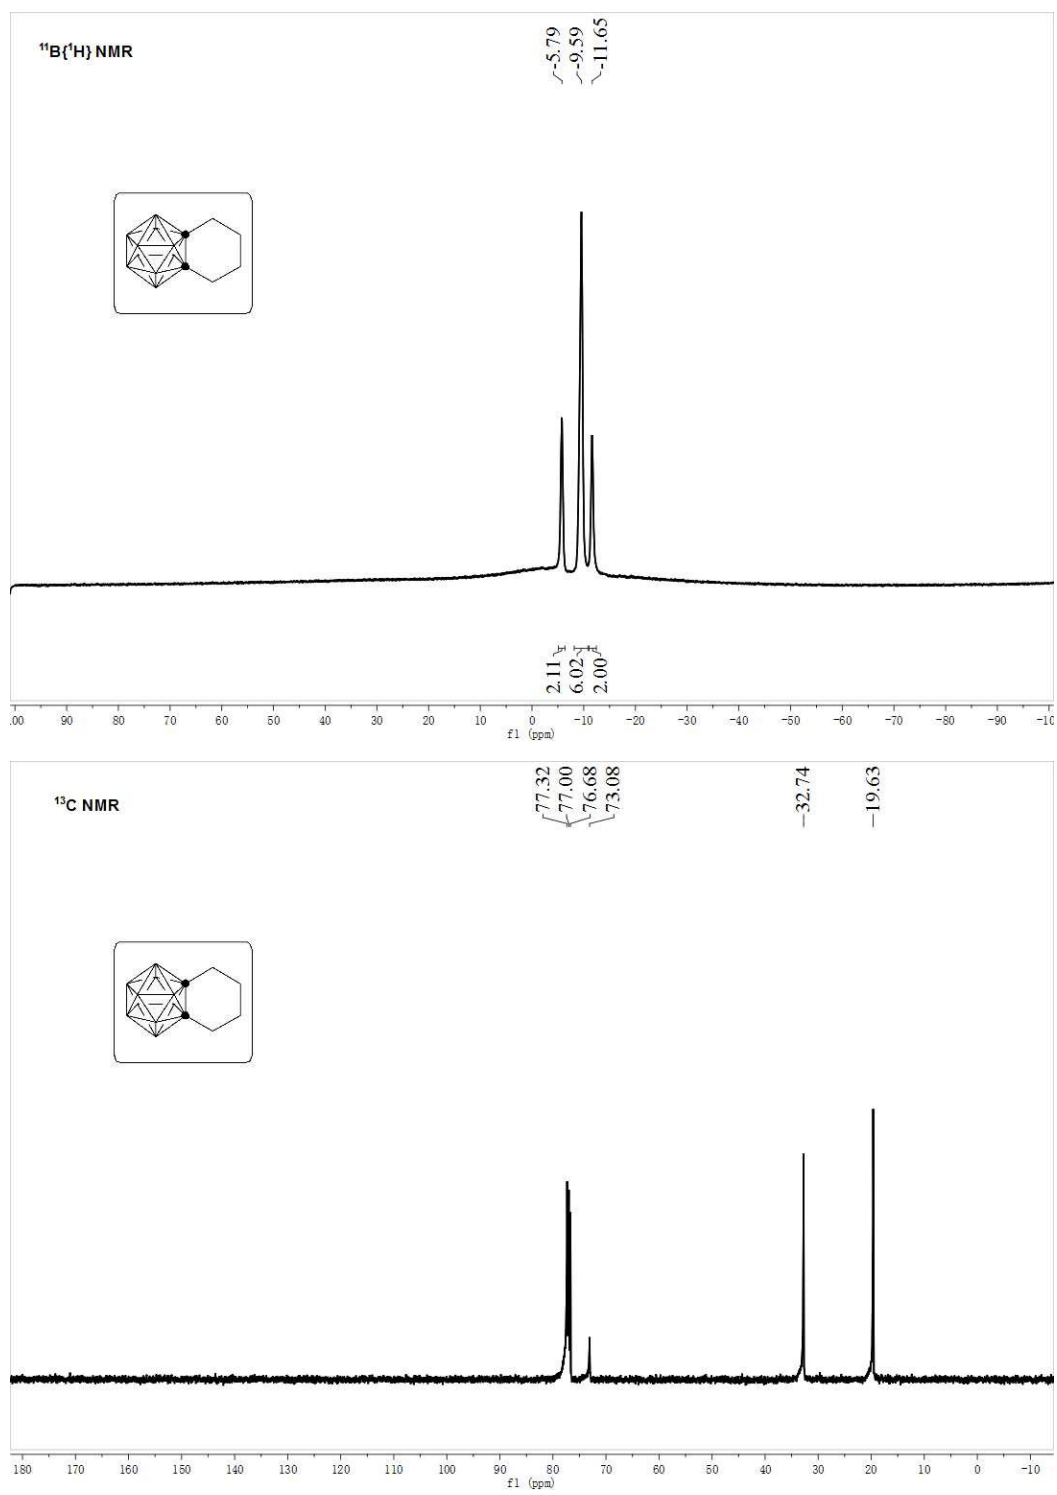

Figure S3. The  $^1\text{H}$  NMR,  $^1\text{H}\{\text{B}\}$  NMR,  $^{11}\text{B}$  NMR,  $^{11}\text{B}\{^1\text{H}\}$  NMR and  $^{13}\text{C}$  NMR spectrum of **2** in  $\text{CDCl}_3$ .

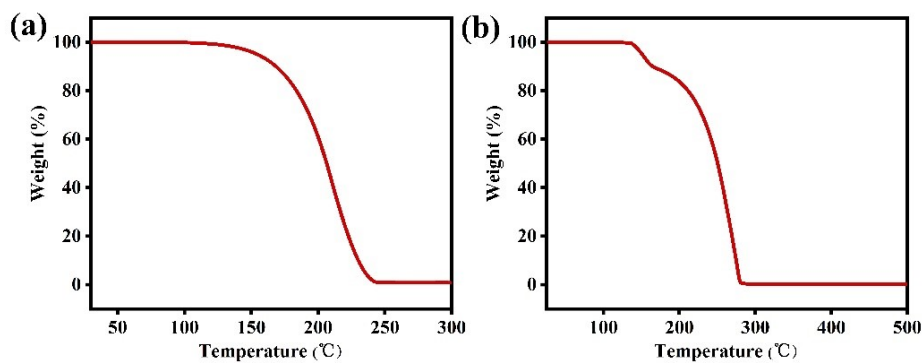

Figure S4. TGA of **1** (a) and **2** (b).

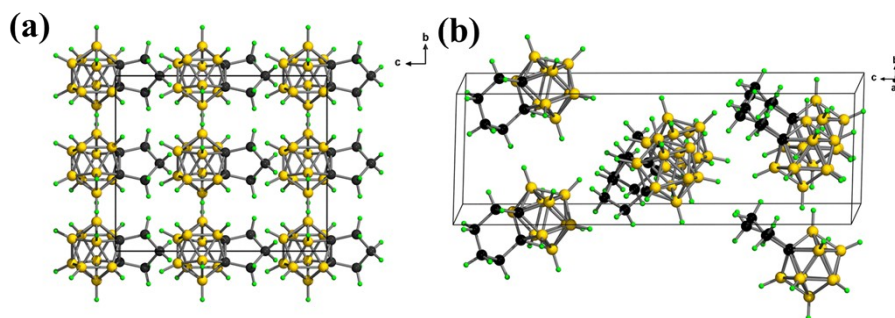

Figure S5. Crystal packing diagram of **1** (a) and **2** (b).

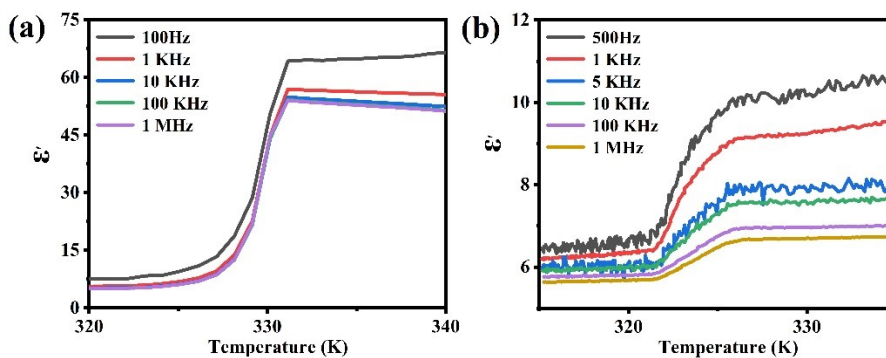

Figure S6. The temperature-dependent real part ( $\epsilon'$ ) of the dielectric constant at different frequency for both **1** (a) and **2** (b).

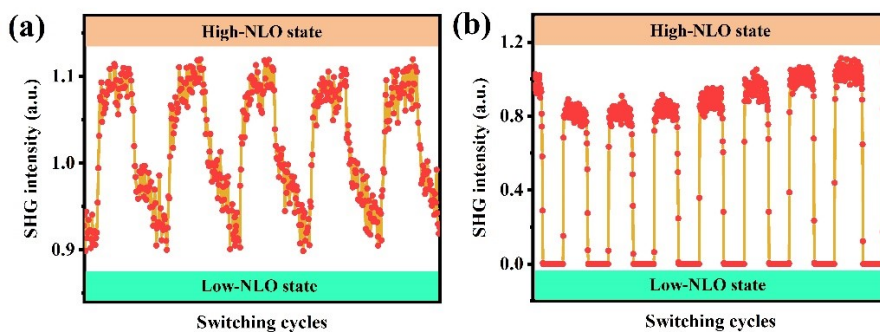

Figure S7. Switching SHG cycles of **1** (a) and **2** (b).

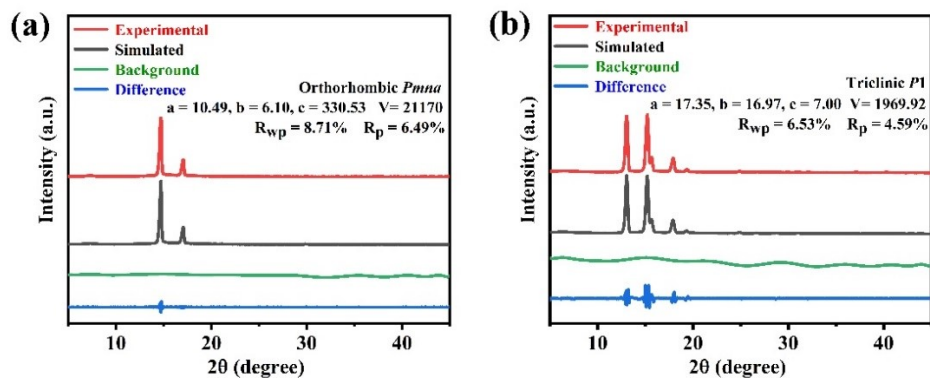

Figure S8. Pawley refinement of PXRD data of 1–2 collected at high temperature.

Table S1. Crystal data and structure refinement for 1–2.

| Formula                                             | $C_5H_{16}B_{10}$ | $C_6H_{18}B_{10}$ |
|-----------------------------------------------------|-------------------|-------------------|
| Temperature                                         | 296 K             | 296 K             |
| Formula weight                                      | 184.28            | 198.30            |
| Crystal system                                      | orthorhombic      | trigonal          |
| Space group                                         | $Aea 2$           | $P 3_1$           |
| $a$ (Å)                                             | 9.807(3)          | 7.2478(4)         |
| $b$ (Å)                                             | 9.951(4)          | 7.2478(4)         |
| $c$ (Å)                                             | 12.038(4)         | 20.608(2)         |
| $V(\text{Å}^3)$                                     | 1174.8(7)         | 937.52(14)        |
| $Z$                                                 | 4                 | 3                 |
| $D_{\text{calc}}$ ( $\text{g}\cdot\text{cm}^{-3}$ ) | 1.042             | 1.054             |
| $F(000)$                                            | 384.0             | 312.0             |
| $\theta_{\text{max}}$                               | 27.193            | 30.945            |
| $\mu(\text{Mo Ka}, \text{mm}^{-1})$                 | 0.045             | 0.047             |
| Reflections collected                               | 3170              | 7026              |

|                                        |                                  |                                  |
|----------------------------------------|----------------------------------|----------------------------------|
| Unique reflections                     | 1195 [ $R_{(int)} = 0.0414$ ]    | 1999 [ $R_{(int)} = 0.0667$ ]    |
| No. of variables                       | 69                               | 145                              |
| Final $R$ indices ( $I \geq 2\sigma$ ) | $R_1 = 0.0737$ , $wR_2 = 0.1985$ | $R_1 = 0.0704$ , $wR_2 = 0.1676$ |
| $R$ indices (all data)                 | $R_1 = 0.1136$ , $wR_2 = 0.2338$ | $R_1 = 0.1258$ , $wR_2 = 0.1899$ |
| Goodness-of-fit                        | 1.037                            | 0.944                            |
